# Supplementary material for: The influence of oxidative debris on the fragmentation and laser desorption/ionization process of graphene oxide derivatives
Source: Royal Society of Chemistry journal article supplement (doi:10.1039/c8nj02628a), 2018-01-01
Supplement: c8nj02628a1.pdf [file c8nj02628a1.pdf]

## Supporting Information

# The influence of oxidative debris on fragmentation and laser desorption/ionization process of graphene oxide derivatives

*Yu Lim Hong,<sup>a,b</sup> Jieon Lee,<sup>c</sup> Bon-Cheol Ku,<sup>a</sup> Kyungtae Kang,<sup>d</sup> Seunghyun Lee,<sup>e</sup> Seongwoo Ryu<sup>b</sup> and  
Young-Kwan Kim<sup>a\*</sup>*

<sup>a</sup>Carbon Composite Materials Research Center, Institute of Advanced Composite Materials, Korea  
Institute of Science and Technology, San 101, Eunha-ri, Bongdong-eup, Wanju-gun, Jeollabuk-do, 565-  
905 Korea

<sup>b</sup>Department of Advanced Materials Engineering, University of Suwon, Hwaseong-Si, Gyeonggi-do, 445-  
743, Korea

<sup>c</sup>Predictive Toxicology Department, Korea Institute of Toxicology, 141 Gajeong-ro, Yuseong-gu,  
Daejeon, 34114, Korea

<sup>d</sup>Department of Applied Chemistry, Kyung Hee University, Yongin, Gyeonggi 446-701, South Korea

<sup>e</sup>Department of Nanochemistry, Gachon University, Sungnam, Gyeonggi 13120, Republic of Korea

\* To whom correspondence should be addressed. E-mail Address: [youngkwan@kist.re.kr](mailto:youngkwan@kist.re.kr); Fax: +82-63-219-  
8239; Tel: +82-63-219-8172

**Supporting figure**

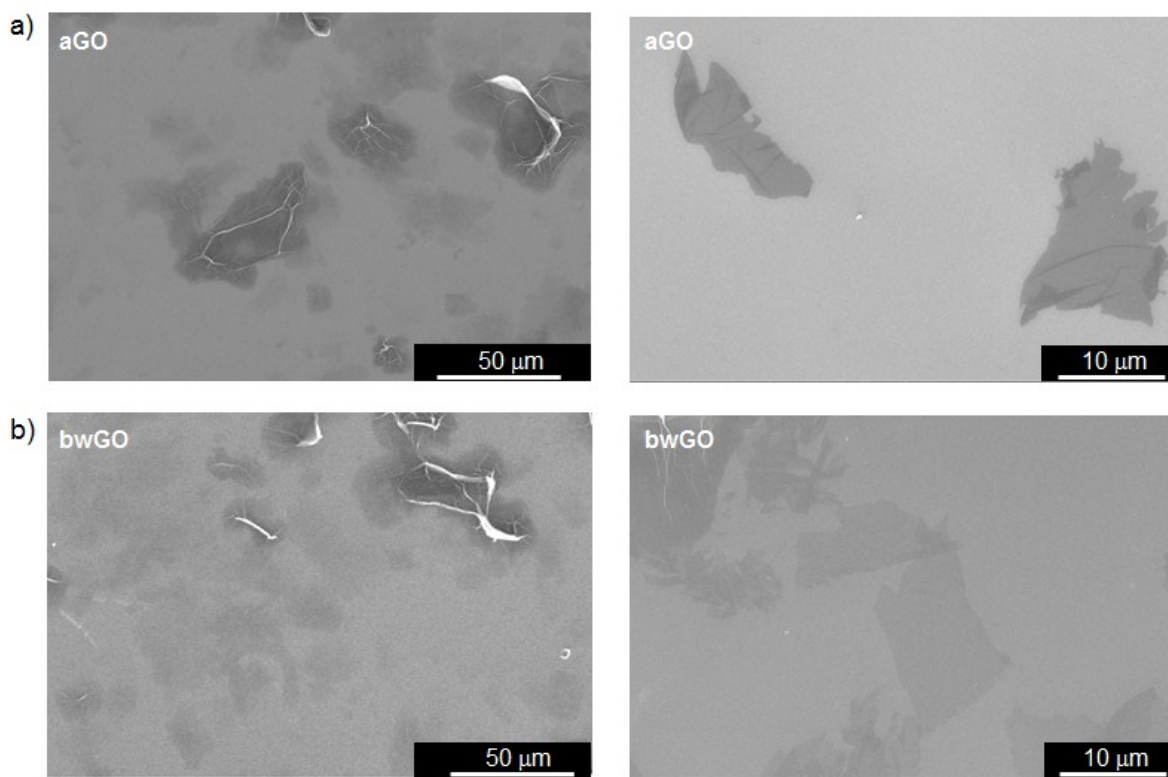

**Figure S1.** SEM images (different magnification) of aGO (a) and bwGO (b).

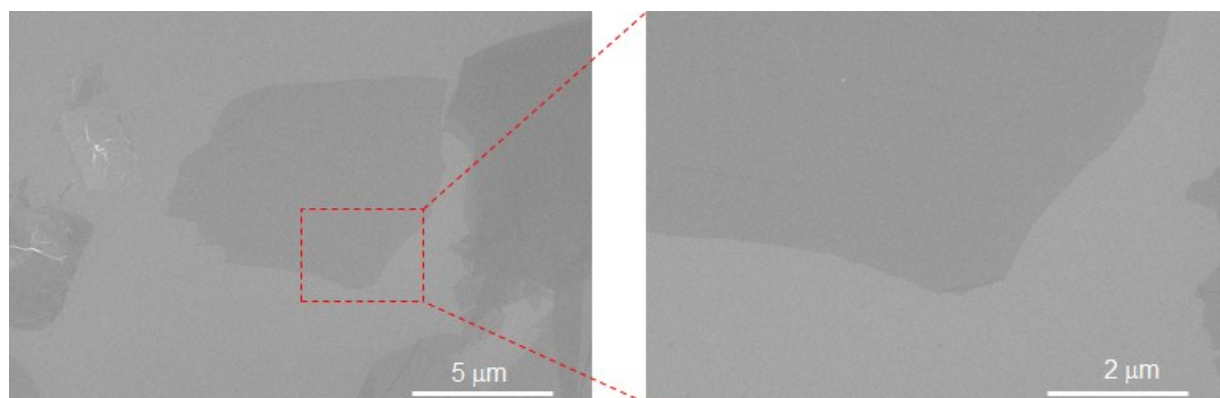

**Figure S2.** SEM images (different magnification) of bwGO which shows their edge structures.

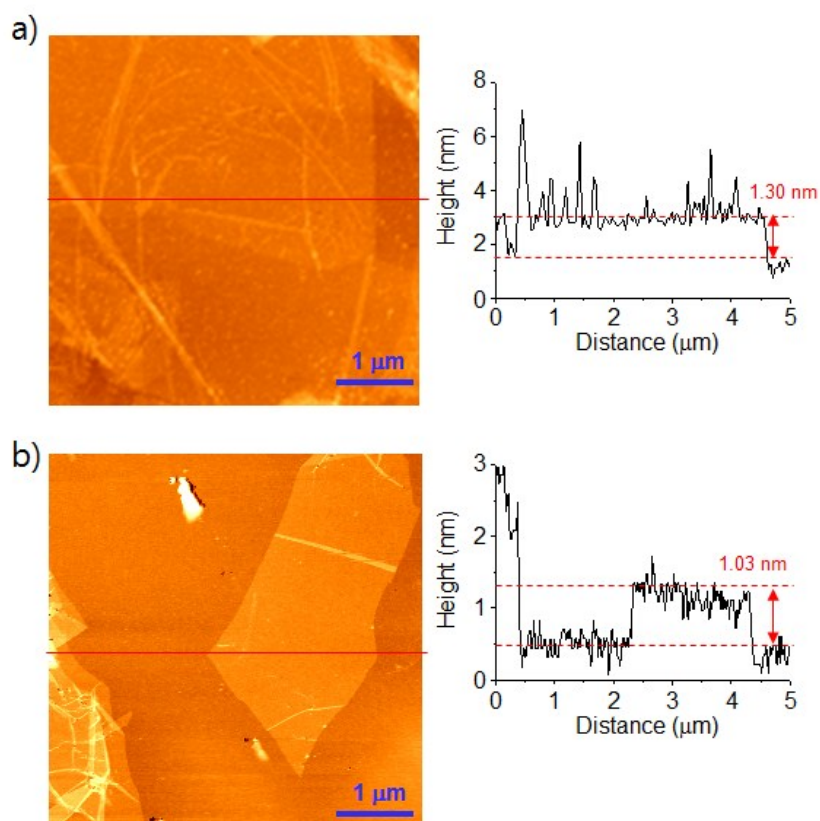

**Figure S3.** AFM images and line profiles of aGO (a) and bwGO (b) which confirm that both aGO and bwGO were exfoliated into single-layer.

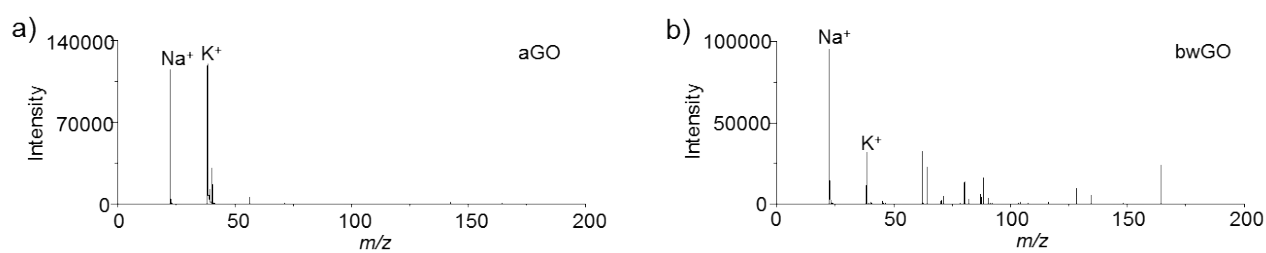

**Figure S4.** Mass spectra of aGO (a) and bwGO (b). We are unable to clearly assign the mass peaks detected under positive ionization mode because of the interference from cationic adducts.

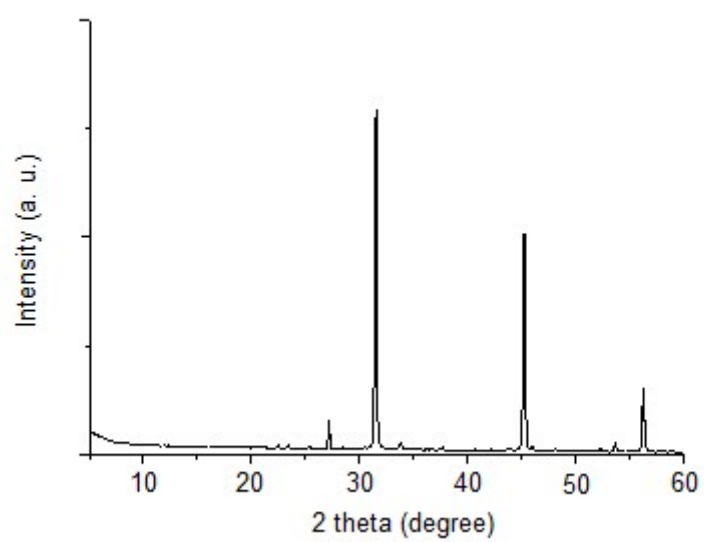

**Figure S5.** XRD pattern of OD.

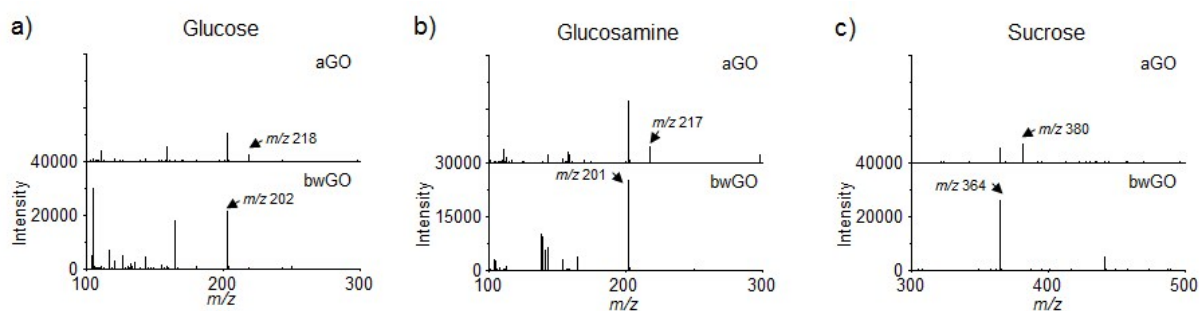

**Figure S6.** Mass spectra obtained from 1 nmol of glucose (a), glucosamine (b) and sucrose (c) with aGO and bwGO. The molecules were successfully detected with aGO and bwGO (Glucose:  $m/z$  202  $[M+Na]^+$  and  $m/z$  218  $[M+K]^+$ , glucosamine:  $m/z$  201  $[M+Na]^+$  and  $m/z$  217  $[M+K]^+$ , sucrose:  $m/z$  364  $[M+Na]^+$  and  $m/z$  380  $[M+K]^+$ ). Interestingly, bwGO showed higher LDI efficiency and less formation of cationic adducts than aGO.
